# Supplementary material
Source: PubMed Central journal article supplement (PMC8581064)
Supplement: NIHMS1703957-supplement-sm3.pdf [file NIHMS1703957-supplement-sm3.pdf]

Supplement 3

Appendix of ED Fall Risk Assessment Instruments

**Memorial Emergency Department Fall Risk Assessment Tool**

**ED Fall Risk Assessment Tool - MHS**

History

**History of Falling in Last 3 Months, Including Since Admission**

No  
 Yes - single mechanical fall  
 Yes - physiological fall (syncope)  
 Yes - fall prone (multiple falls)

Yes - single mechanical fall = 1 point  
Yes - physiological fall (Syncope) = 2 points  
Yes - fall prone (multiple falls) = 3 points

Observation

**Confusion or Disorientation**

No  
 Yes

Yes = 5 points

**Intoxicated or Sedated**

No  
 Yes

Yes = 3 points

**Impaired Gait**

No  
 Yes

Yes = 1 point

**Mobility Assist Device Used**

No  
 Yes

Yes = 1 point

**Altered Elimination**

No  
 Yes

Yes = 1 point

**Fall Risk Score**

Low Risk = 1-2 points  
Moderate risk = 3-4 points (Recommend Fall Risk Bundle)  
High risk = 5 points or more (Recommend Fall Risk Bundle and Alarms)

**Fall Score >= 3 ?**  Yes  
 No

ADVANCED EMERGENCY NURSING JOURNAL

Reference:

Flarity K, Pate T, Finch H. Development and implementation of the Memorial Emergency Department Fall Risk Assessment Tool. Adv Emerg Nurs J 2013;35(1):57-66. doi:10.1097/TME.0b013e31827c6a54

## Kinder Fall Risk Assessment Tool

| Risk Assessment                                                                                                                                                                                                                                          | Yes* | No | Fall Intervention<br>(Yellow “Fall<br>Risk bracelet”<br>applied) | Triage<br>RN |
|----------------------------------------------------------------------------------------------------------------------------------------------------------------------------------------------------------------------------------------------------------|------|----|------------------------------------------------------------------|--------------|
| <b>Presented to emergency department<br/>because of falls</b><br>(Syncope, seizure, or loss of consciousness)                                                                                                                                            |      |    |                                                                  |              |
| <b>Age &gt; 70</b>                                                                                                                                                                                                                                       |      |    |                                                                  |              |
| <b>Altered Mental Status<br/>Intoxication with alcohol or substance<br/>confusion</b><br>(Disorientation, impaired judgment, poor<br>safety awareness, or inability to follow<br>instructions)                                                           |      |    |                                                                  |              |
| <b>Impaired Mobility:<br/>Ambulates or transfers with assistive<br/>devices or assistance;<br/>Unable to ambulate or transfer.</b>                                                                                                                       |      |    |                                                                  |              |
| <b>Nurse Judgment:</b><br>(Bowel or bladder incontinence, diarrhea,<br>urinary frequency or urgency,<br>Sensory deficits, leg weakness, orthostatic<br>hypotension, dizziness or vertigo, and<br>medications such as diuretics, narcotics,<br>sedatives) |      |    |                                                                  |              |

\*YES to any risk category = high fall risk

### Reference:

Townsend AB, Valle-Ortiz M, Sansweet T. A Successful ED Fall Risk Program Using the KINDER 1 Fall RiskAssessment Tool. J Emerg Nurs 2016;42(6):492-497. doi:10.1016/j.jen.2016.03.028

# Johns Hopkins Fall Risk Assessment Tool

| <b>Johns Hopkins<br/>Fall Risk Assessment Tool for Home Health Care</b>                                                                                                                                                                                                                                                                                                                                                                                                                                                                                                                                                                                                                                                                                                                  |        |
|------------------------------------------------------------------------------------------------------------------------------------------------------------------------------------------------------------------------------------------------------------------------------------------------------------------------------------------------------------------------------------------------------------------------------------------------------------------------------------------------------------------------------------------------------------------------------------------------------------------------------------------------------------------------------------------------------------------------------------------------------------------------------------------|--------|
| <p><b>If patient has any of the following conditions, check the box and apply Fall Risk interventions as indicated.</b></p> <p><b>High Fall Risk - Implement High Fall Risk interventions per protocol</b></p> <ul style="list-style-type: none"> <li><input type="checkbox"/> History of more than one fall within 6 months before admission</li> <li><input type="checkbox"/> Patient is deemed high fall-risk per protocol (e.g., seizure precautions)</li> </ul> <p><b>Low Fall Risk - Implement Low Fall Risk interventions per protocol</b></p> <ul style="list-style-type: none"> <li><input type="checkbox"/> Complete paralysis or completely immobilized</li> </ul> <p><b>Do not continue with Fall Risk Score Calculation if any of the above conditions are checked.</b></p> |        |
| FALL RISK SCORE CALCULATION – Select the appropriate option in each category. Add all points to calculate Fall Risk Score. (If no option is selected, score for category is 0)                                                                                                                                                                                                                                                                                                                                                                                                                                                                                                                                                                                                           | Points |
| <p><b>Age</b> (<i>single-select</i>)</p> <ul style="list-style-type: none"> <li><input type="checkbox"/> 60 - 69 years (1 point)</li> <li><input type="checkbox"/> 70 - 79 years (2 points)</li> <li><input type="checkbox"/> greater than or equal to 80 years (3 points)</li> </ul>                                                                                                                                                                                                                                                                                                                                                                                                                                                                                                    |        |
| <p><b>Fall History</b> (<i>single-select</i>)</p> <ul style="list-style-type: none"> <li><input type="checkbox"/> One fall within 6 months before admission (5 points)</li> </ul>                                                                                                                                                                                                                                                                                                                                                                                                                                                                                                                                                                                                        |        |
| <p><b>Elimination, Bowel and Urine</b> (<i>single-select</i>)</p> <ul style="list-style-type: none"> <li><input type="checkbox"/> Incontinence (2 points)</li> <li><input type="checkbox"/> Urgency or frequency (2 points)</li> <li><input type="checkbox"/> Urgency/frequency and incontinence (4 points)</li> </ul>                                                                                                                                                                                                                                                                                                                                                                                                                                                                   |        |
| <p><b>Medications:</b> Includes PCA/opiates, anticonvulsants, anti-hypertensives, diuretics, hypnotics, laxatives, sedatives, and psychotropics (<i>single-select</i>)</p> <ul style="list-style-type: none"> <li><input type="checkbox"/> On 1 high fall risk drug (3 points)</li> <li><input type="checkbox"/> On 2 or more high fall risk drugs (5 points)</li> <li><input type="checkbox"/> Sedated procedure within past 24 hours (7 points)</li> </ul>                                                                                                                                                                                                                                                                                                                             |        |
| <p><b>Patient Care Equipment:</b> Any equipment that tethers patient (e.g., IV infusion, chest tube, indwelling catheter, SCDs, etc.) (<i>single-select</i>)</p> <ul style="list-style-type: none"> <li><input type="checkbox"/> One present (1 point)</li> <li><input type="checkbox"/> Two present (2 points)</li> <li><input type="checkbox"/> 3 or more present (3 points)</li> </ul>                                                                                                                                                                                                                                                                                                                                                                                                |        |
| <p><b>Mobility</b> (<i>multi-select; choose all that apply and add points together</i>)</p> <ul style="list-style-type: none"> <li><input type="checkbox"/> Requires assistance or supervision for mobility, transfer, or ambulation (2 points)</li> <li><input type="checkbox"/> Unsteady gait (2 points)</li> <li><input type="checkbox"/> Visual or auditory impairment affecting mobility (2 points)</li> </ul>                                                                                                                                                                                                                                                                                                                                                                      |        |
| <p><b>Cognition</b> (<i>multi-select; choose all that apply and add points together</i>)</p> <ul style="list-style-type: none"> <li><input type="checkbox"/> Altered awareness of immediate physical environment (1 point)</li> <li><input type="checkbox"/> Impulsive (2 points)</li> <li><input type="checkbox"/> Lack of understanding of one's physical and cognitive limitations (4 points)</li> </ul>                                                                                                                                                                                                                                                                                                                                                                              |        |
| <b>Total Fall Risk Score (Sum of all points per category)</b>                                                                                                                                                                                                                                                                                                                                                                                                                                                                                                                                                                                                                                                                                                                            |        |
| <b>SCORING: 6-13 Total Points = Moderate Fall Risk, &gt;13 Total Points = High Fall Risk</b>                                                                                                                                                                                                                                                                                                                                                                                                                                                                                                                                                                                                                                                                                             |        |

A license is required for use of this tool. To purchase, contact [jnh@jhmi.edu](mailto:jnh@jhmi.edu).  
Copyright ©2007 by The Johns Hopkins Health System Corporation.

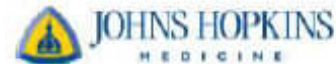

**Reference:**

Luo S, Kalman M, Haines P. Evaluating a Fall Risk Assessment Tool in an Emergency Department. J Healthc Qual 2020;42(4):205-214. doi:10.1097/JHQ.0000000000000233

## Hendrich II Fall Risk Model

| Hendrich II Fall Risk Model                                                                                                                                                                                                                                                                      |                    |       |
|--------------------------------------------------------------------------------------------------------------------------------------------------------------------------------------------------------------------------------------------------------------------------------------------------|--------------------|-------|
| RISK FACTOR                                                                                                                                                                                                                                                                                      | RISK POINTS        | SCORE |
| Confusion/Disorientation/Impulsivity                                                                                                                                                                                                                                                             | 4                  |       |
| Symptomatic Depression                                                                                                                                                                                                                                                                           | 2                  |       |
| Altered Elimination                                                                                                                                                                                                                                                                              | 1                  |       |
| Dizziness/Vertigo                                                                                                                                                                                                                                                                                | 1                  |       |
| Gender (Male)                                                                                                                                                                                                                                                                                    | 1                  |       |
| <b>Any Administered Antiepileptics (anticonvulsants):</b><br>(Carbamazepine, Divalproex Sodium, Ethotoin, Ethosuximide, Felbamate, Fosphenytoin, Gabapentin, Lamotrigine, Mephenytoin, Methsuximide, Phenobarbital, Phenytoin, Primidone, Topiramate, Trimethadione, Valproic Acid) <sup>1</sup> | 2                  |       |
| <b>Any Administered Benzodiazepines:<sup>2</sup></b><br>(Alprazolam, Chloridiazepoxide, Clonazepam, Clorazepate Dipotassium, Diazepam, Flurazepam, Halazepam <sup>3</sup> , Lorazepam, Midazolam, Oxazepam, Temazepam, Triazolam)                                                                | 1                  |       |
| <b>Get-Up-and-Go Test: "Rising from a Chair"</b>                                                                                                                                                                                                                                                 |                    |       |
| If unable to assess, monitor for change in activity level, assess other risk factors, document both on patient chart with date and time.                                                                                                                                                         |                    |       |
| Ability to rise in single movement - No loss of balance with steps                                                                                                                                                                                                                               | 0                  |       |
| Pushes up, successful in one attempt                                                                                                                                                                                                                                                             | 1                  |       |
| Multiple attempts but successful                                                                                                                                                                                                                                                                 | 3                  |       |
| Unable to rise without assistance during test                                                                                                                                                                                                                                                    | 4                  |       |
| If unable to assess, document this on the patient chart with the date and time.                                                                                                                                                                                                                  |                    |       |
| (A score of 5 or greater = High Risk)                                                                                                                                                                                                                                                            | <b>TOTAL SCORE</b> |       |
| © 2012 AHI of Indiana, Inc. All rights reserved. United States Patent No. 7,282,031 and U.S. Patent No. 7,682,308.<br>Reproduction of copyright and patented materials without authorization is a violation of federal law.                                                                      |                    |       |

**On-going Medication Review Updates:**

1. Levetiracetam (Keppra) was not assessed during the original research conducted to create the Hendrich Fall Risk Model. As an antiepileptic, levetiracetam does have a side effect of somnolence and dizziness which contributes to its fall risk and should be scored (effective June 2010).
2. The study did not include the effect of benzodiazepine-like drugs since they were not on the market at the time. However, due to their similarity in drug structure, mechanism of action and drug effects, they should also be scored (effective January 2010).
3. Halazepam was included in the study but is no longer available in the United States (effective June 2010).

### Reference:

Hendrich AL, Bender PS, Nyhuis A. Validation of the Hendrich II Fall Risk Model: a large concurrent case/control study of hospitalized patients [published correction appears in Appl Nurs Res 2003 Aug;16(3):208]. Appl Nurs Res 2003;16(1):9-21. doi:10.1053/apnr.2003.YAPNR2

## **Falls Risk for Older People in the Community (FROP-Com) tool**

### *Balance*

- 1) Number of falls in the past 12 months?
  - No falls (0 points); 1 fall (1); 2 falls (2); 3 or more falls (3)
- 2) Was an injury sustained in any of the fall/s in the past 12 months?
  - No (0); minor injury, did not require medical attention (1); minor injury, did require medical attention (2); severe injury (fracture, etc.) (3)
- 3) Describe the circumstances of the most recent fall in the past 12 months.

### *Medications*

- 4) List all medications currently taken.
- 5) Number of prescription medications.
  - No medication (0); 1-2 medications (1); 3 medications (2); 4 or more medications (3)
- 6) Does the individual take any of the following type of medication? E.g sedative, antidepressant, anti-epileptic, central acting analgesic, digoxin, diuretics, type 1A antiarrhythmic, vestibular suppressant
  - None apply (0); 1-2 apply (1); 3 apply (2); 4 or more apply (3)

### *Medical conditions*

- 7) Does the individual have a chronic medical condition/s affecting their balance & mobility? E.g. arthritis, respiratory condition, Parkinson's disease, diabetes, dementia, peripheral neuropathy, cardiac condition, stroke, other neurological conditions, lower limb amputation, osteoporosis, vestibular disorder, other dizziness, back pain, lower limb joint replacement
  - None apply (0); 1-2 apply (1); 3-4 apply (2); 5 or more apply (3)

### *Sensory loss*

- 8) Does the client have an uncorrected sensory deficit/s that limits their functional ability?
  - Vision: No (0), Yes (1)
  - Somatosensory: No (0); Yes (1)

### *Feet and footwear*

- 9) Does the client have foot problems, e.g. corns, bunions, swelling, etc.?
  - No (0); Yes (1)
- 10) Does the client have inappropriate, poorly fitting, or worn footwear?
  - No (0); Yes (1)

### *Cognitive status*

- 11) AMTS score -- age, time (to the nearest hour), address to recall, current year, current location (where are we?), recognition of two persons (Dr., nurse), date of birth, years of first World War, name of current prime minister, count backwards from 20 by ones
  - Number of correct responses: 9-10 (0); 7-8 (1); 5-6 (2); 4 or less (3)

### *Continence*

- 12) Is the individual continent?

- Yes (0); No (1)
- 13) Does the individual regularly have to go to the toilet in the night (3 or more times)?
- No (0); Yes (1)

*Nutritional status*

- 14) Has the individual's food intake declined in the past three months due to a loss of appetite, digestive problems, chewing or swallowing difficulties?
- No (0); small change, but intake remains good (1); moderate loss of appetite (2); severe loss of appetite, poor oral intake (3)
- 15) Weight loss during the last 3-12 months
- Nil (0); minimal (<1 kg) or unsure (1); moderate (1-3 kg) (2); marked (>3 kg) (3)
- 16) Number of alcoholic drinks consumed in the past week
- Nil (0); 1-3 (1); 4-10 (2); 11+ (3)

*Environment*

- 17) Did the home environment appear safe?
- Yes (0); minimal environmental hazards (1); moderate environment hazards requiring modification (2); extremely unsafe environment (3)

*Functional behavior*

- 18) Observed behaviors in Activities of Daily Living and Mobility indicate
- Consistently aware of current abilities/seeks appropriate assistance as required (0); generally aware of current abilities/occasional risk-taking behavior (1); under-estimates abilities/inappropriately fearful of activity (2); over-estimates abilities/frequent risk-taking behavior (3)

*Function*

- 19) Prior to this fall, how much assistance was the individual requiring for personal care activities of daily living (eg dressing, grooming, toileting)?
- None (completely independent) (0); supervision (1); some assistance required (2); completely dependent (3)
- 20) Has this changed since the most recent fall?
- No (0); Yes (1)
- 21) Prior to this fall, how much assistance was the individual requiring for instrumental activities of daily living (eg shopping, housework, laundry)?
- None (completely independent) (0); supervision (1); some assistance required (2); completely dependent (3)
- 22) Has this changed since the most recent fall?
- No (0); Yes (1)

*Balance*

- 23) Does the individual, upon observation of walking and turning, appear unsteady or at risk of losing their balance?

- No unsteadiness observed (0); Yes, minimally unsteady on walking or turning (1); Yes moderately unsteady on walking or turning (needs supervision) (2); Yes, consistently and severely unsteady on walking or turning (needs constant hands on assistance) (3)

*Gait/Physical activity*

24) Can the individual walk safely around their own home?

- Independent, no gait aid needed (0); independent with a gait aid (1); safe with supervision/physical assistance (2); unsafe (3)

25) Can the individual walk safely in the community?

- Independent, no gait aid needed (0); independent with a gait aid (1); safe with supervision/physical assistance (2); unsafe (3)

26) If a walking aid is used, list the aid and when it is used.

27) How physically active is the individual?

- Very active (exercises 3 times per week) (0); moderately active (exercises less than twice per week) (1); not very active (rarely leaves the house) (2); inactive (rarely leaves one room of the house) (3)

28) Has this changed since the most recent fall?

- No (0); Yes (1)

Grading of falls risk:

0-11; Mild falls risk; Implement actions for identified individual risk factors, & recommend health promotion behaviour to minimise future ongoing risk (eg – increased physical activity, good nutrition)

12-18; Moderate falls risk; Implement actions for identified individual risk factors

19-60; High falls risk; Implement actions for identified individual risk factors, and implement additional actions for high falls risk (e.g. refer to a specialist Falls Clinic)

Reference:

Mascarenhas M, Hill KD, Barker A, Burton E. Validity of the Falls Risk for Older People in the Community (FROP-Com) tool to predict falls and fall injuries for older people presenting to the emergency department after falling. *Eur J Ageing* 2019;16(3):377-386. Published 2019 Jan 21. doi:10.1007/s10433-018-0496-x

## **Tiedemann score**

- 1) Two or more falls in the past year? (2 points)
- 2) Take 6 or more medications? (1 point)

Interpretation Score > 2 = older adult at increased risk for falls.

## **Reference:**

Tiedemann A, Sherrington C, Orr T, et al. Identifying older people at high risk of future falls: development and validation of a screening tool for use in emergency departments. *Emerg Med J* 2013;30(11):918-922. doi:10.1136/emered-2012-201783



## Centers for Disease Control & Prevention STEADI tool

### Check Your Risk for Falling

| Circle "Yes" or "No" for each statement below |        |                                                                                                                                                            | Why it matters                                                                                |
|-----------------------------------------------|--------|------------------------------------------------------------------------------------------------------------------------------------------------------------|-----------------------------------------------------------------------------------------------|
| Yes (2)                                       | No (0) | I have fallen in the past year.                                                                                                                            | People who have fallen once are likely to fall again.                                         |
| Yes (2)                                       | No (0) | I use or have been advised to use a cane or walker to get around safely.                                                                                   | People who have been advised to use a cane or walker may already be more likely to fall.      |
| Yes (1)                                       | No (0) | Sometimes I feel unsteady when I am walking.                                                                                                               | Unsteadiness or needing support while walking are signs of poor balance.                      |
| Yes (1)                                       | No (0) | I steady myself by holding onto furniture when walking at home.                                                                                            | This is also a sign of poor balance.                                                          |
| Yes (1)                                       | No (0) | I am worried about falling.                                                                                                                                | People who are worried about falling are more likely to fall.                                 |
| Yes (1)                                       | No (0) | I need to push with my hands to stand up from a chair.                                                                                                     | This is a sign of weak leg muscles, a major reason for falling.                               |
| Yes (1)                                       | No (0) | I have some trouble stepping up onto a curb.                                                                                                               | This is also a sign of weak leg muscles.                                                      |
| Yes (1)                                       | No (0) | I often have to rush to the toilet.                                                                                                                        | Rushing to the bathroom, especially at night, increases your chance of falling.               |
| Yes (1)                                       | No (0) | I have lost some feeling in my feet.                                                                                                                       | Numbness in your feet can cause stumbles and lead to falls.                                   |
| Yes (1)                                       | No (0) | I take medicine that sometimes makes me feel light-headed or more tired than usual.                                                                        | Side effects from medicines can sometimes increase your chance of falling.                    |
| Yes (1)                                       | No (0) | I take medicine to help me sleep or improve my mood.                                                                                                       | These medicines can sometimes increase your chance of falling.                                |
| Yes (1)                                       | No (0) | I often feel sad or depressed.                                                                                                                             | Symptoms of depression, such as not feeling well or feeling slowed down, are linked to falls. |
| <b>Total</b> _____                            |        | Add up the number of points for each "yes" answer. If you scored 4 points or more, you may be at risk for falling. Discuss this brochure with your doctor. |                                                                                               |

This checklist was developed by the Greater Los Angeles VA Geriatric Research Education Clinical Center and affiliates and is a validated fall risk self-assessment tool (Rubenstein et al. J Safety Res; 2011: 42(6)493-499). Adapted with permission of the authors.

### Reference:

Sri-On J, Tirrell GP, Kamsom A, Marill KA, Shankar KN, Liu SW. A High-yield Fall Risk and Adverse Events Screening Questions From the Stopping Elderly Accidents, Death, and Injuries (STEADI) Guideline for Older Emergency Department Fall Patients [published online ahead of print, 2018 Mar 25]. Acad Emerg Med 2018;10.1111/acem.13413. doi:10.1111/acem.13413

## Timed Up and Go

### ASSESSMENT

# Timed Up & Go (TUG)

**Purpose:** To assess mobility

**Equipment:** A stopwatch

**Directions:** Patients wear their regular footwear and can use a walking aid, if needed. Begin by having the patient sit back in a standard arm chair and identify a line 3 meters, or 10 feet away, on the floor.

#### ① Instruct the patient:

##### When I say “Go,” I want you to:

1. Stand up from the chair.
2. Walk to the line on the floor at your normal pace.
3. Turn.
4. Walk back to the chair at your normal pace.
5. Sit down again.

#### NOTE:

Always stay by the patient for safety.

#### ② On the word “Go,” begin timing.

#### ③ Stop timing after patient sits back down.

#### ④ Record time.

**Time in Seconds:** \_\_\_\_\_

An older adult who takes  $\geq 12$  seconds to complete the TUG is at risk for falling.

Patient \_\_\_\_\_

Date \_\_\_\_\_

Time \_\_\_\_\_  AM  PM

### OBSERVATIONS

Observe the patient's postural stability, gait, stride length, and sway.

#### Check all that apply:

- Slow tentative pace
- Loss of balance
- Short strides
- Little or no arm swing
- Steadying self on walls
- Shuffling
- En bloc turning
- Not using assistive device properly

These changes may signify neurological problems that require further evaluation.

## ASSESSMENT

# 30-Second Chair Stand

**Purpose:** To test leg strength and endurance

**Equipment:** A chair with a straight back without arm rests (seat 17" high), and a stopwatch.

### ① Instruct the patient:

1. Sit in the middle of the chair.
2. Place your hands on the opposite shoulder crossed, at the wrists.
3. Keep your feet flat on the floor.
4. Keep your back straight, and keep your arms against your chest.
5. On "Go," rise to a full standing position, then sit back down again.
6. Repeat this for 30 seconds.

#### NOTE:

Stand next to the patient for safety.

Patient \_\_\_\_\_

Date \_\_\_\_\_

Time \_\_\_\_\_  AM  PM

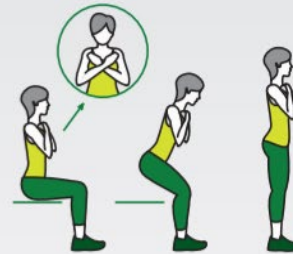

## SCORING

### Chair Stand Below Average Scores

| AGE   | MEN  | WOMEN |
|-------|------|-------|
| 60-64 | < 14 | < 12  |
| 65-69 | < 12 | < 11  |
| 70-74 | < 12 | < 10  |
| 75-79 | < 11 | < 10  |
| 80-84 | < 10 | < 9   |
| 85-89 | < 8  | < 8   |
| 90-94 | < 7  | < 4   |

A below average score indicates a risk for falls.

Number: \_\_\_\_\_ Score: \_\_\_\_\_

## Reference:

Chow RB, Lee A, Kane BG, et al. Effectiveness of the "Timed Up and Go" (TUG) and the Chair test as screening tools for geriatric fall risk assessment in the ED. Am J Emerg Me. 2019;37(3):457-460. doi:10.1016/j.ajem.2018.06.015

## Morse Fall Scale

### Morse Fall Scale

(Adapted with permission, SAGE Publications)

The Morse Fall Scale (MFS) is a rapid and simple method of assessing a patient's likelihood of falling. A large majority of nurses (82.9%) rate the scale as "quick and easy to use," and 54% estimated that it took less than 3 minutes to rate a patient. It consists of six variables that are quick and easy to score, and it has been shown to have predictive validity and interrater reliability. The MFS is used widely in acute care settings, both in the hospital and long term care inpatient settings.

| <i>Item</i>                                                                     | <i>Scale</i>   | <i>Scoring</i> |
|---------------------------------------------------------------------------------|----------------|----------------|
| 1. History of falling; immediate or within 3 months                             | No 0<br>Yes 25 | _____          |
| 2. Secondary diagnosis                                                          | No 0<br>Yes 15 | _____          |
| 3. Ambulatory aid<br>Bed rest/nurse assist<br>Crutches/cane/walker<br>Furniture | 0<br>15<br>30  | _____          |
| 4. IV/Heparin Lock                                                              | No 0<br>Yes 20 | _____          |
| 5. Gait/Transferring<br>Normal/bedrest/immobile<br>Weak<br>Impaired             | 0<br>10<br>20  | _____          |
| 6. Mental status<br>Oriented to own ability<br>Forgets limitations              | 0<br>15        | _____          |

The items in the scale are scored as follows:

*History of falling:* This is scored as 25 if the patient has fallen during the present hospital admission or if there was an immediate history of physiological falls, such as from seizures or an impaired gait prior to admission. If the patient has not fallen, this is scored 0. Note: If a patient falls for the first time, then his or her score immediately increases by 25.

*Secondary diagnosis:* This is scored as 15 if more than one medical diagnosis is listed on the patient's chart; if not, score 0.

*Ambulatory aids:* This is scored as 0 if the patient walks without a walking aid (even if assisted by a nurse), uses a wheelchair, or is on a bed rest and does not get out of bed at all. If the patient uses crutches, a cane, or a walker, this item scores 15; if the patient ambulates clutching onto the furniture for support, score this item 30.

*Intravenous therapy:* This is scored as 20 if the patient has an intravenous apparatus or a heparin lock

#### Reference:

Çinarlı T, Koç Z. Fear and Risk of Falling, Activities of Daily Living, and Quality of Life: Assessment When Older Adults Receive Emergency Department Care. *Nurs Res* 2017;66(4):330-335. doi:10.1097/NNR.0000000000000227

## Prevention of Falls in Older Persons Living in the Community

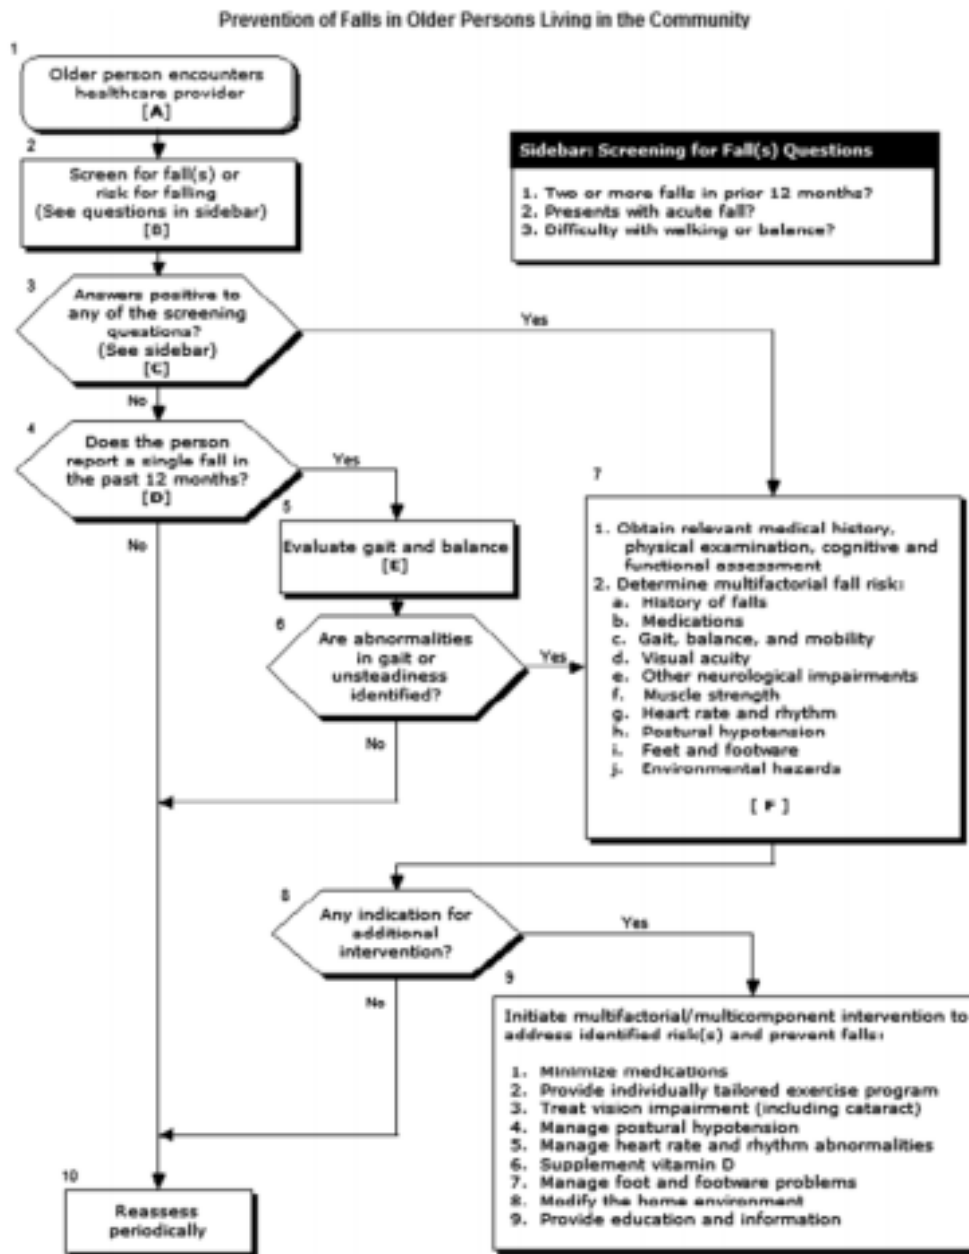

### Reference:

Panel on Prevention of Falls in Older Persons, American Geriatrics Society and British Geriatrics Society. Summary of the Updated American Geriatrics Society/British Geriatrics Society clinical practice guideline for prevention of falls in older persons. *J Am Geriatr Soc* 2011;59(1):148-157. doi:10.1111/j.1532-5415.2010.03234.x
